# Supplementary material for: Challenges associated with the climatic interpretation of water stable isotope records from a highly resolved firn core from Adélie Land, coastal Antarctica
Source: Copernicus journal article supplement (doi:10.5194/tc-2018-121), 2018-07-04
Supplement: Supplementary file 1 [file tc-2018-121-supplement.pdf]

# Supplementary Material

Sentia Goursaud<sup>1,2</sup>, Valérie Masson-Delmotte<sup>1</sup>, Vincent Favier<sup>2</sup>, Suzanne Preunkert<sup>2</sup>, Michel Legrand<sup>2</sup>,  
Bénédicte Minster<sup>1</sup>, Michel Werner<sup>3</sup>

5

<sup>1</sup>LSCE (UMR CEA-CNRS-UVSQ 8212-IPSL), Gif-sur-Yvette, France

<sup>2</sup>Univ. Grenoble Alpes, CNRS, IGE, F-38000 Grenoble, France

10 <sup>3</sup>Alfred Wegener Institute, Helmholtz Centre for Polar and Marine Research, Bremerhaven, Germany

*Correspondence to:* Sentia Goursaud ([sentia.goursaud@lsce.ipsl.fr](mailto:sentia.goursaud@lsce.ipsl.fr))

S1: Non sea-salt sulfate (“nssSO<sub>4</sub>”, in ppb) measured along the S1C1 firn core, the TA192A firn core (“TA”) based on summer fractionation only and along the TA192A firn core based on summer fractionation for spring to summer seasons and winter fractionation for autumn to winter seasons (“TA\*”), over their common period 1998-2006. Vertical lines correspond to standard deviation ( $\pm 1$ ).

5

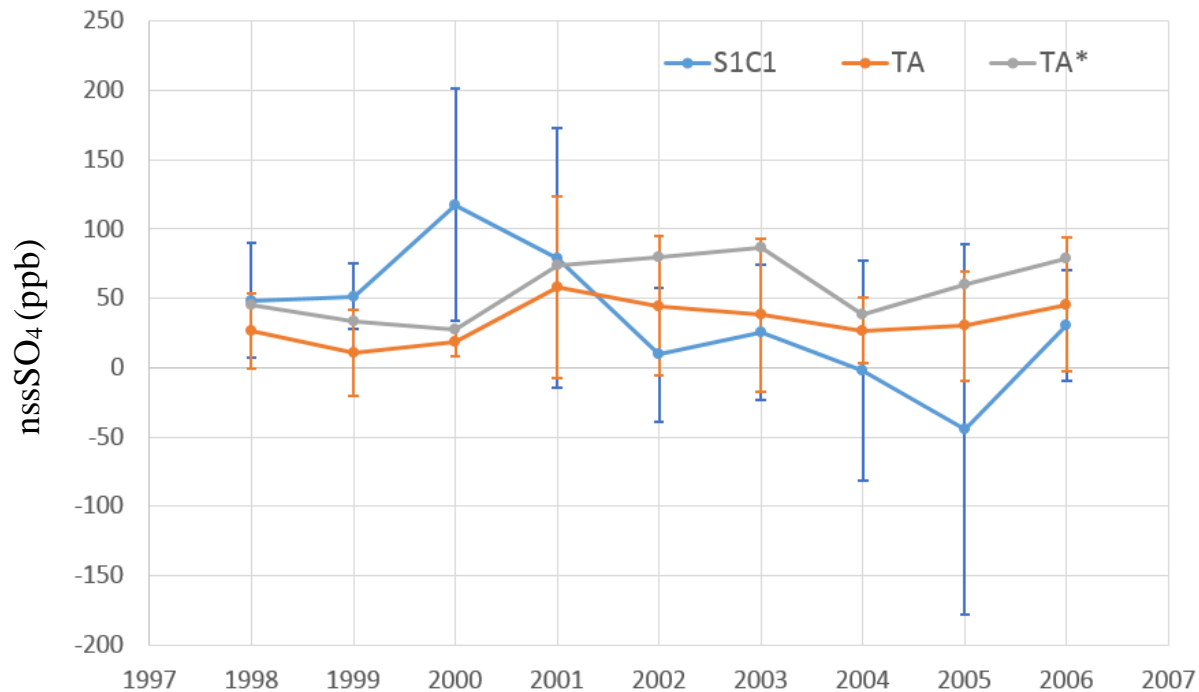

**S2: Total mean  $\delta^{18}\text{O}$  seasonal amplitude (in ‰) and ratio of the three first years mean  $\delta^{18}\text{O}$  seasonal amplitude by the mean  $\delta^{18}\text{O}$  seasonal amplitude.**

| Station  | Recorded period | Total mean seasonal amplitude (‰) | Ratio |
|----------|-----------------|-----------------------------------|-------|
| GIP      | 2000-2007       | 15.1                              | 1.2   |
| BI       | 1996-2014       | 9.7                               | 1.1   |
| KM       | 1995-2014       | 7.0                               | 1.5   |
| KC       | 1958-2012       | 1.9                               | 1.0   |
| DSSA     | 1986-1992       | 8.0                               | 1.2   |
| NUS 08-7 | 1382-2008       | 0.8                               | 8.7   |
| WDC06A   | -50-2005        | 1.8                               | 2.9   |
| IND25B5  | 1902-2006       | 4.4                               | 1.2   |
| TA192A   | 1998-2014       | 8.6                               | 0.5   |

**S3: Total mean deuterium excess seasonal amplitude (in ‰) and ratio of the three first years mean  $\delta^{18}\text{O}$  seasonal amplitude by the mean  $\delta^{18}\text{O}$  seasonal amplitude.**

| Station  | Recorded period | Total mean seasonal amplitude (‰) | Ratio |
|----------|-----------------|-----------------------------------|-------|
| GIP      | 2000-2007       | 17.8                              | 1.4   |
| BI       | 1996-2014       | 6.3                               | 1.1   |
| KM       | 1995-2014       | 5.5                               | 1.4   |
| KC       | 1958-2012       | 2.7                               | 1.0   |
| DSSA     | 1986-1992       | 5.3                               | 1.1   |
| NUS 08-7 | 1382-2008       | 1.9                               | 4.1   |
| WDC06A   | -50-2005        | 3.2                               | 1.1   |
| IND25B5  | 1902-2006       | 7.6                               | 0.9   |
| TA192A   | 1998-2014       | 6.5                               | 1.1   |

**S4: Percentage of annual precipitation for the summer, from December to February (“DJF”), the autumn, from March to May (“MAM”), the winter, from June to September (“JJAS”) and the spring, from October to November (“ON”), within each year from 1998 to 2014 simulated by ERA-interim.**

| Year | DJF  | MAM  | JJAS | ON   |
|------|------|------|------|------|
| 1998 | 22.4 | 36.0 | 33.2 | 8.4  |
| 1999 | 37.9 | 18.4 | 33.0 | 10.6 |
| 2000 | 22.5 | 16.6 | 47.4 | 13.5 |
| 2001 | 24.8 | 35.6 | 31.3 | 8.2  |
| 2002 | 31.4 | 22.1 | 36.3 | 10.2 |
| 2003 | 33.3 | 13.7 | 46.4 | 6.6  |
| 2004 | 15.3 | 33.8 | 45.2 | 5.8  |
| 2005 | 22.5 | 20.4 | 27.3 | 29.8 |
| 2006 | 25.6 | 40.7 | 26.0 | 7.7  |
| 2007 | 32.3 | 34.5 | 26.3 | 6.9  |
| 2008 | 15.3 | 35.2 | 39.4 | 10.0 |
| 2009 | 24.7 | 26.3 | 45.9 | 3.1  |
| 2010 | 31.6 | 22.8 | 27.4 | 18.3 |
| 2011 | 32.9 | 20.4 | 27.5 | 19.2 |
| 2012 | 28.2 | 19.7 | 43.7 | 8.4  |
| 2013 | 26.3 | 26.8 | 41.0 | 5.9  |
| 2014 | 40.3 | 31.7 | 23.6 | 4.3  |

5 S5: Meteorological time series over the period 1998-2014 averaged at the inter-annual scale. Near-surface temperature (in °C). Relative humidity (in %). sea level pressure (in hPa). wind speed (in m/s) and direction (°E) were provided by Meteo France. The local sea-ice concentration (in %) is extracted in the 135°E-145°E sector (with a latitudinal range of 50°S-90°S) from the Nimbus-7 Scanning Multichannel Microwave Radiometer (SMMR) and Defense Meteorological Satellite Program Special Sensor Microwave/Imagers - Special Sensor Microwave Image/Sounder (DMSP SSM/I-SSMIS) passive microwave data (Cavalieri et al., 1996). Horizontal dashed lines correspond to the climatological averages over 1998-2014 while the vertical solid lines correspond to the standard deviations.

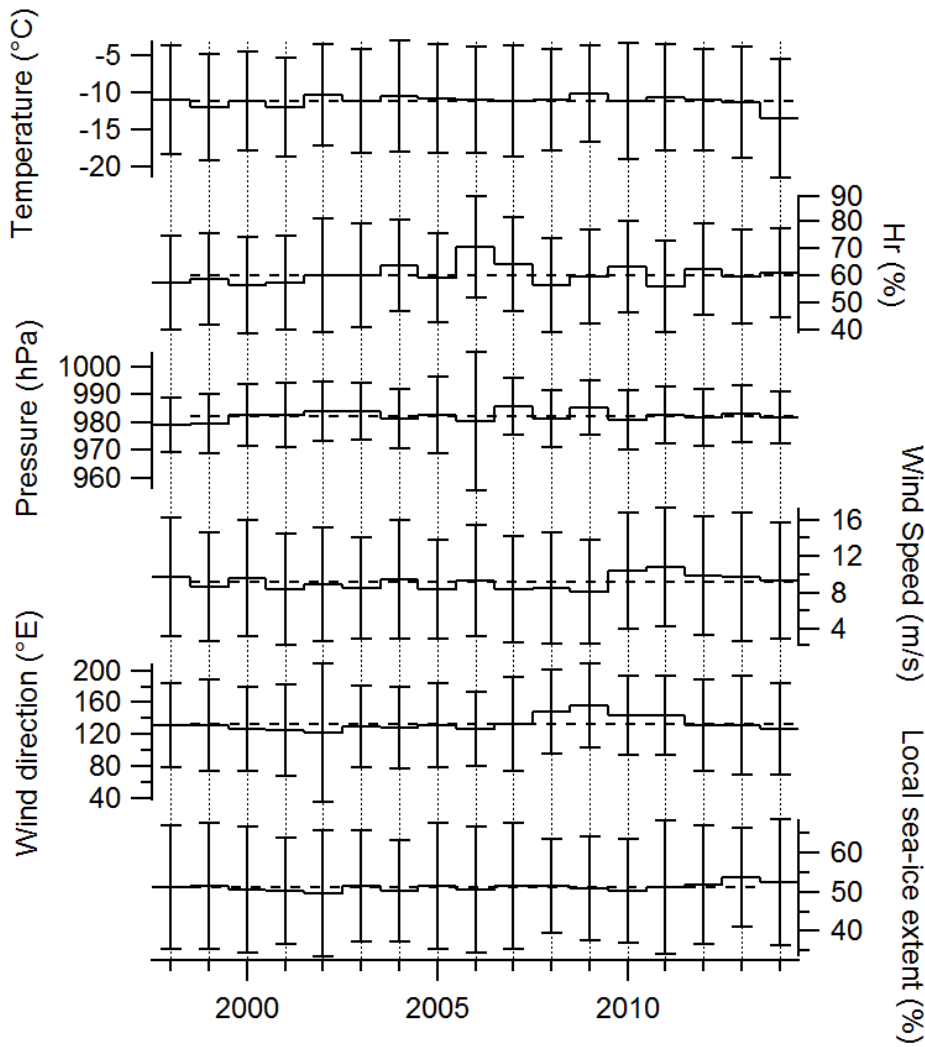

S6: Dated TA192A ice core annually averaged records over the period 1998-2014: accumulation (in cm w. e.  $y^{-1}$ ), concentrations of Na<sup>+</sup> (in ppb), nssSO<sub>4</sub> (in ppb), MSA (in ppb),  $\delta^{18}O$  (in ‰) and d-excess (in ‰). Horizontal dashed lines correspond to 1998-2014 average values and vertical bars indicate the intra-annual standard deviation from resampled values.

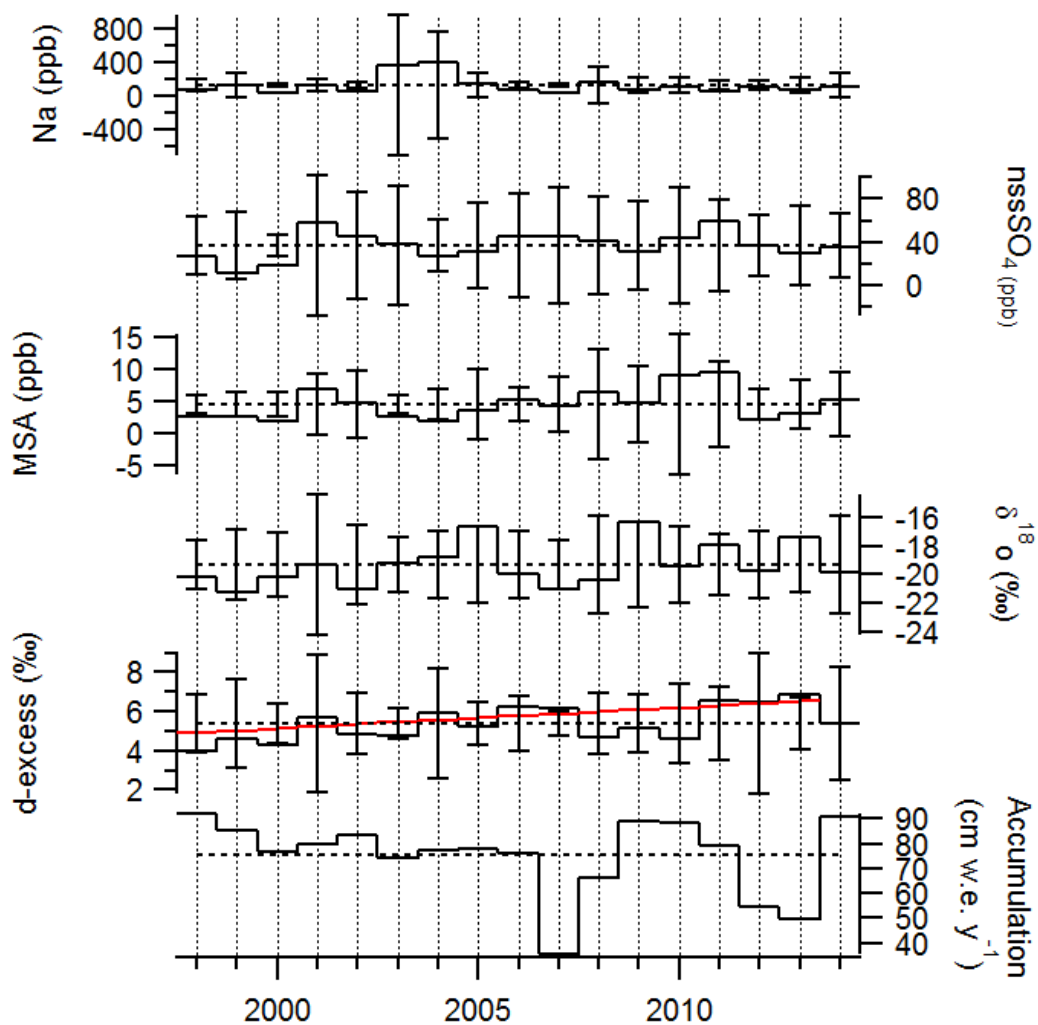

**S7: Mean seasonal amplitude (“ $\mu$ ”, in ‰) and standard deviation (“ $\sigma$ ”, in ‰) of  $\delta^{18}\text{O}$  and deuterium excess (“dxs”) from precipitation data from our database**

| Site      | Monitoring /<br>recorded period | $\mu(\delta^{18}\text{O})$ | $\sigma(\delta^{18}\text{O})$ | $\mu(\text{dxs})$ | $\sigma(\text{dxs})$ |
|-----------|---------------------------------|----------------------------|-------------------------------|-------------------|----------------------|
| Vernadsky | 1964-2013                       | 9.0                        | 2.0                           | 21.4              | 9.6                  |
| Halley    | 1965-2014                       | 16.3                       | 4.1                           | 17.2              | 8.6                  |
| Marsh     | 1990-1991                       | 10.7                       | 3.4                           | 23.8              | 0.8                  |
| Rothera   | 1996-2014                       | 9.8                        | 2.7                           | 16.7              | 7.6                  |
| Neumayer  | 1981-2000                       | 19.9                       | 5.6                           | 17.7              | 6.8                  |
| Dome F    | 2003-2004                       | 33.7                       | 15.3                          | 94.2              | 25.3                 |
| Dome C    | 2007-2010                       | 31.4                       | 11.0                          | 67.0              | 14.8                 |
| GIP       | 2000-2007                       | 15.1                       | 3.6                           | 17.8              | 16.2                 |
| BI        | 1996-2014                       | 9.7                        | 2.9                           | 6.3               | 3.0                  |
| KM        | 1995-2014                       | 7.0                        | 3.0                           | 5.5               | 2.4                  |
| KC        | 1958-2012                       | 1.9                        | 1.4                           | 2.7               | 1.3                  |
| DSSA      | 1986-1992                       | 8.0                        | 2.8                           | 5.3               | 1.0                  |
| NUS 08-7  | 1382-2008                       | 0.8                        | 1.1                           | 1.9               | 1.7                  |
| WDC06A    | -50-2005                        | 1.8                        | 1.1                           | 3.2               | 1.0                  |
| IND25B5   | 1902-2006                       | 4.4                        | 2.1                           | 7.6               | 6.4                  |
| TA192A    | 1998-2014                       | 8.6                        | 2.1                           | 6.5               | 2.8                  |



S8: Time series of the simulated accumulated (i.e. precipitation minus evaporation, in  $\text{cm w.e. y}^{-1}$ ), 2-meter temperature ("2m-T", in  $^{\circ}\text{C}$ ), wind speed (in  $\text{m s}^{-1}$ ), precipitated  $\delta^{18}\text{O}$  (in ‰) and precipitated d-excess (in ‰), by the ECHAM5-wiso model at the annual scale over the period 1998 – 2014. Shaded vertical lines show outstanding years (i.e. associated with values out of the range defined by  $\text{mean} \pm 2 \times \text{standard deviation}$ ). Shading is in red when higher than the upper bound of this range, while it is in blue when lower than the inferior bound.

5

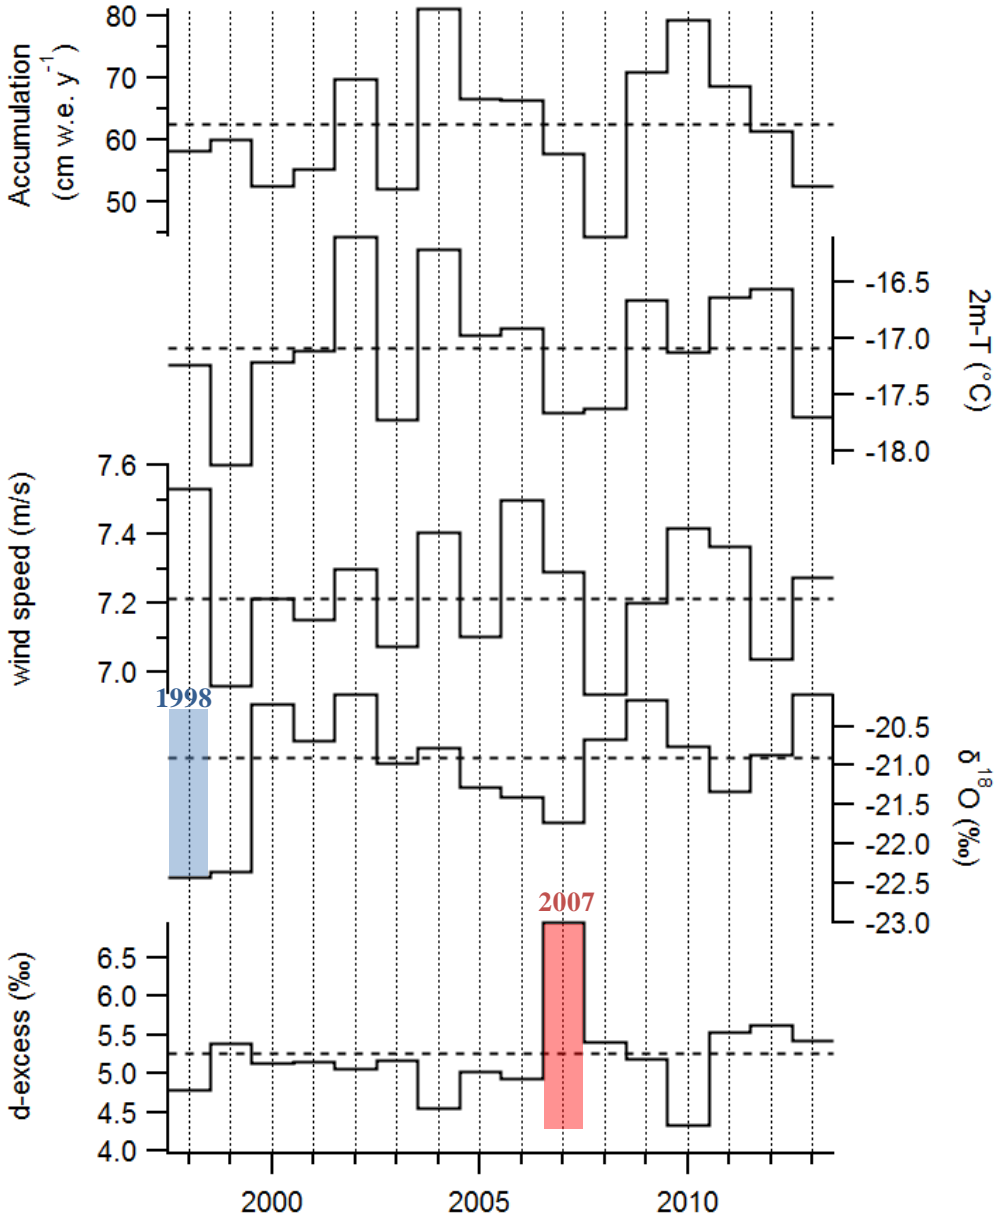

5 S9: ECHAM5-wiso outputs simulated (a) from the 6<sup>th</sup> to the 08<sup>th</sup> of May in 2007 and averaged over the period 1979-2013: 2-meter temperature (2m-T, in °C), precipitation (in mm w.e. month<sup>-1</sup>), zonal wind component (in m s<sup>-1</sup>), meridional wind component (in m s<sup>-1</sup>), the geopotential height at 500 hPa (z500, in m), the  $\delta^{18}\text{O}$  (in ‰) and the d-excess (in ‰). Outputs simulated the 07<sup>th</sup> of May are highlighted using italic and bold formats; and (b) for the deuterium excess (“d-excess”, in ‰) at the daily scale over the whole year 2007.

| Date                          | Prec.               |                                | u10 (m s <sup>-1</sup> ) | v10 (m s <sup>-1</sup> ) | z500 (m)             | $\delta^{18}\text{O}$ (‰) | d-excess (‰)       |
|-------------------------------|---------------------|--------------------------------|--------------------------|--------------------------|----------------------|---------------------------|--------------------|
|                               | 2m-T (°C)           | (mm w.e. month <sup>-1</sup> ) |                          |                          |                      |                           |                    |
| 06/05/2007                    | -21.3               | 0.9                            | -0.5                     | 6.2                      | 4870.8               | -21.6                     | 13.4               |
| <b><i>07/05/2007</i></b>      | <b><i>-22.4</i></b> | <b><i>0.2</i></b>              | <b><i>-0.8</i></b>       | <b><i>3.4</i></b>        | <b><i>4897.0</i></b> | <b><i>6.2</i></b>         | <b><i>43.3</i></b> |
| 08/05/2007                    | -20.8               | 0.1                            | 0.3                      | 6.6                      | 5014.5               | -13.7                     | 9.1                |
| 06/05 1979-2013               | -23.7               | 40.4                           | -2.4                     | 7.2                      | 4970.3               | -24.4                     | 8.0                |
| <b><i>07/05 1979-2013</i></b> | <b><i>-23.0</i></b> | <b><i>50.8</i></b>             | <b><i>-2.7</i></b>       | <b><i>7.0</i></b>        | <b><i>4994.3</i></b> | <b><i>-22.1</i></b>       | <b><i>7.9</i></b>  |
| 08/05 1979-2013               | -22.0               | 66.4                           | -2.6                     | 6.9                      | 5002.6               | -22.0                     | 5.9                |

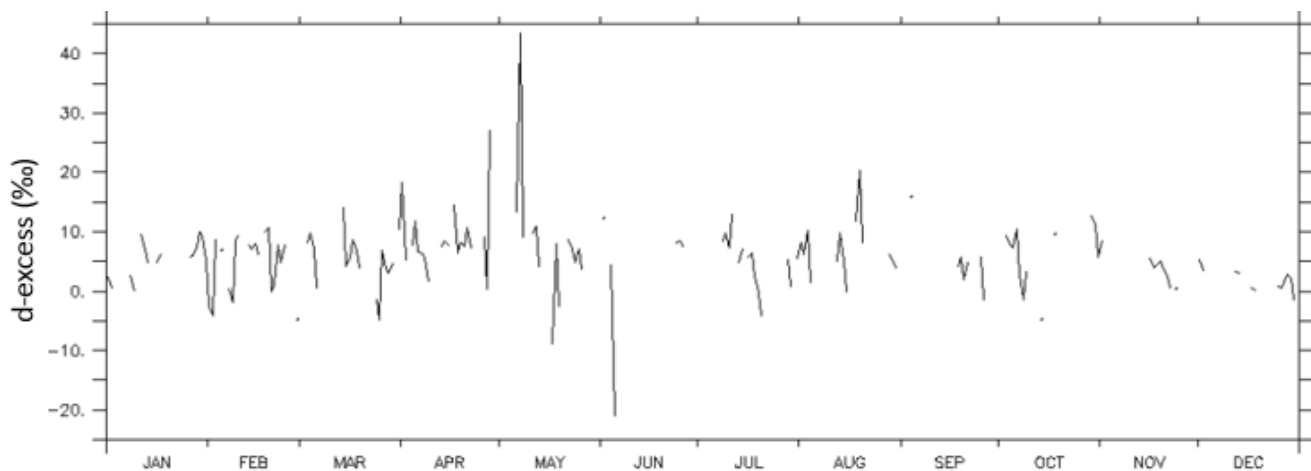

(b)

**S10: Slope ( $\text{‰ } \text{‰}^{-1}$ ) and correlation coefficient of the running d-excess versus  $\delta^{18}\text{O}$  linear regressions over 10 points based on the  $\delta^{18}\text{O}$  and d-excess simulated in the precipitation by the ECHAM5-wiso model, at the corresponding grid point to the TA192A drilling site. Only the results of the significant relationships are given. The date associated with the results correspond to the first point of the regression.**

5

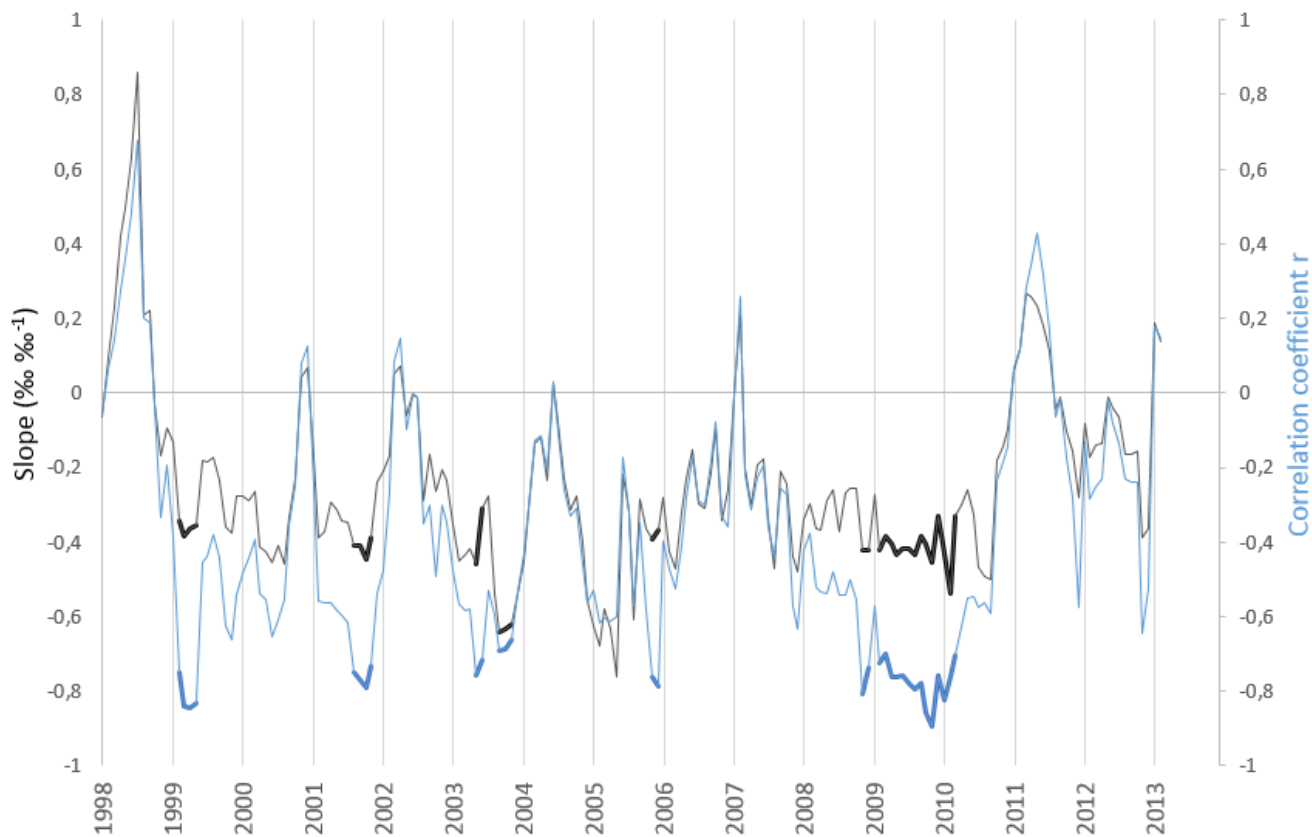

**S11: Mean values of Na<sup>+</sup> (in ppb), non sea-salt sulfate based on summer fractionation only (“nssSO<sub>4</sub>”) (in ppb) and methane sulfonate (“MSA”) (in ppb), recorded in the S1C1 and the TA192A firn core (“TA”), as well as the ratio of the TA/S1C1 mean values ratio. Numbers into bracket correspond to the standard deviations.**

|               | Na <sup>+</sup> (ppb) | nssSO <sub>4</sub> (ppb) | MSA (ppb)   |
|---------------|-----------------------|--------------------------|-------------|
| S1C1          | 395.6 (± 154.7)       | 34.9 (± 33.2)            | 5.2 (± 3.6) |
| TA            | 284.6 (± 124.5)       | 44.3 (± 13.9)            | 2.6 (± 1.6) |
| TA/S1C1 ratio | 0.7                   | 0.8                      | 0.5         |

5
