# Supplementary material for: Challenges associated with the climatic interpretation of water stable isotope records from a highly resolved firn core from Adélie Land, coastal Antarctica
Source: Copernicus journal article supplement (doi:10.5194/tc-2018-121), 2018-07-04
Supplement: Supplementary file [file tc-2018-121-AC1-supplement.pdf]

Table 1: Occurrence of months associated to a  $\delta^{18}\text{O}$  annual maximum simulated by the ECHAM5-wiso model

| Month      | January | March | August | November | December |
|------------|---------|-------|--------|----------|----------|
| Occurrence | 6       | 2     | 2      | 5        | 2        |

Table 2: Peak number (as shown in Figure 1), depth (in m snow equivalent), nssSO<sub>4,summer</sub> (in ppb), MSA (in ppb), and δ<sup>18</sup>O (in ‰) for each peak associated to an uncertainty in our dating.

| Peak number | Depth (m s.e.) | nssSO <sub>4,summer</sub> (ppb) | MSA (ppb) | δ <sup>18</sup> O (‰) |
|-------------|----------------|---------------------------------|-----------|-----------------------|
| 1           | 0.54           | 76.2                            | 4.0       | -16.7                 |
| 2           | 6.78           | 109.2                           | 0.2       | -15.3                 |
| 3           | 12.5           | 10.4                            | 2.1       | -17.9                 |

Table 3: Parameters of the linear relationship of the annual reconstructed accumulations including uncertain peaks 2 (“test2”), 3 (“test3”) and both 2 and 3 (“test23”) as shown in Fig. 1, and the original reconstructed accumulation given in the submitted version (“original”), with the simulated accumulation from the ECHAM5-wiso over the same cover period than the resulting reconstructions: the slope, the correlation coefficient (“r”), and the p-value and the standard error (“stderr”). The line in bold highlights the reconstruction which gives the best correlation.

|                 | slope<br>(cm w.e. $y^{-1}$ (cm w.e. $y^{-1})^{-1}$ ) | r           | pvalue      | stderr      |
|-----------------|------------------------------------------------------|-------------|-------------|-------------|
| test2           | 0.03                                                 | 0.06        | 0.82        | 0.20        |
| test3           | 0.20                                                 | 0.36        | 0.14        | 0.42        |
| test23          | -0.01                                                | -0.02       | 0.93        | 0.14        |
| <b>original</b> | <b>0.28</b>                                          | <b>0.45</b> | <b>0.07</b> | <b>0.22</b> |

Table 4: Parameters of the linear relationship of the  $\delta^{18}\text{O}$  annual averages including uncertain peaks 2 (“test2”), 3 (“test3”) and both 2 and 3 (“test23”) as shown in Fig.1, and the original reconstructed accumulation given in the submitted version (“original”), with the simulated accumulation from the ECHAM5-wiso over the same cover period than the resulting reconstructions: the slope, the correlation coefficient (“r”), the p-value and the standard error (“stderr”).

|          | Slope<br>(‰‰ <sup>-1</sup> ) | r    | pvalue | stderr |
|----------|------------------------------|------|--------|--------|
| original | 0.16                         | 0.32 | 0.21   | 0.12   |
| test1    | 0.14                         | 0.33 | 0.19   | 0.10   |
| test2    | 0.11                         | 0.28 | 0.25   | 0.09   |
| test3    | 0.18                         | 0.37 | 0.14   | 0.11   |
| test23   | 0.11                         | 0.27 | 0.26   | 0.09   |

Table 5: Parameters of the linear relationship of the  $\delta^{18}\text{O}$  annual averages including uncertain peaks 2 (“test2”), 3 (“test3”) and both 2 and 3 (“test23”) as shown in Fig.1, and the original reconstructed accumulation given in the submitted version (“original), with the near-surface temperature measured at Dumont d’Urville over the same cover period than the resulting reconstructions: the slope, the correlation coefficient (“r”), the p-value and the standard error (“stderr”).

|          | slope (‰ °C <sup>-1</sup> ) | r    | pvalue | stderr |
|----------|-----------------------------|------|--------|--------|
| original | 0.59                        | 0.30 | 0.24   | 0.48   |
| test1    | 1.05                        | 0.49 | 0.05   | 0.48   |
| test2    | 0.87                        | 0.36 | 0.16   | 0.58   |
| test3    | 0.57                        | 0.29 | 0.26   | 0.49   |
| test23   | 0.87                        | 0.36 | 0.16   | 0.58   |

Table 6: Parameters of the linear relationship of the  $\delta^{18}\text{O}$  annual averages including uncertain peaks 2 (“test2”), 3 (“test3”) and both 2 and 3 (“test23”) as shown in Fig.1, and given in the submitted version (“original), with the simulated temperature by the ECHAM5-wiso model over the same cover period than the resulting reconstructions: the slope, the correlation coefficient (“r”), the p-value and the standard error (“stderr”).

|          | slope (‰ °C <sup>-1</sup> ) | r    | pvalue | stderr |
|----------|-----------------------------|------|--------|--------|
| original | 0.10                        | 0.26 | 0.31   | 0.10   |
| test1    | 0.08                        | 0.23 | 0.38   | 0.09   |
| test2    | 0.08                        | 0.27 | 0.29   | 0.08   |
| test3    | 0.10                        | 0.26 | 0.32   | 0.09   |
| test23   | 0.08                        | 0.27 | 0.29   | 0.08   |

Table 7: Percentage of annual precipitation for the summer, from December to February (“DJF”), the autumn, from March to May (“MAM”), the winter, from June to September (“JJAS”) and the spring, from October to November (“ON”), within each year from 1998 to 2014 simulated by ERA-interim.

| Year | DJF  | MAM  | JJAS | ON   |
|------|------|------|------|------|
| 1998 | 36.3 | 29.8 | 27.1 | 6.8  |
| 1999 | 26.5 | 22.4 | 38.3 | 12.8 |
| 2000 | 20.1 | 17.4 | 48.7 | 13.8 |
| 2001 | 23.6 | 36.4 | 31.2 | 8.7  |
| 2002 | 34.2 | 21.2 | 34.8 | 9.8  |
| 2003 | 30.8 | 15.1 | 47.0 | 7.1  |
| 2004 | 19.9 | 32.2 | 42.5 | 5.4  |
| 2005 | 20.1 | 21.3 | 28.5 | 30.2 |
| 2006 | 27.3 | 39.9 | 25.5 | 7.3  |
| 2007 | 25.0 | 37.9 | 29.2 | 8.0  |
| 2008 | 19.6 | 33.9 | 37.2 | 9.4  |
| 2009 | 22.7 | 26.8 | 47.2 | 3.3  |
| 2010 | 33.1 | 22.4 | 27.5 | 17.0 |
| 2011 | 38.7 | 18.6 | 25.4 | 17.3 |
| 2012 | 19.0 | 22.7 | 48.9 | 9.3  |
| 2013 | 37.7 | 23.6 | 33.4 | 5.4  |
| 2014 | 33.5 | 35.6 | 26.0 | 5.0  |
